# Supplementary material for: Metabolic Profiling and In Vitro Assessment of the Biological Activities of the Ethyl Acetate Extract of Penicillium chrysogenum “Endozoic of Cliona sp. Marine Sponge” from the Red Sea (Egypt)
Source: MDPI journal article supplement (doi:10.3390/md20050326), 2022-05-15
Supplement: s1 [file s1]

## Supplementary Materials

# Metabolic Profiling and *In Vitro* Assessment of the Biological Activities of the Ethyl Acetate Extract of *Penicillium chrysogenum* “endozoic of *Cliona spp* Marine Sponge,” from the Red Sea (Egypt)

Muneera S. M. Al-Saleem<sup>1</sup>, Wafaa H. B. Hassan<sup>2</sup>, Zeinab I. El Sayed<sup>2</sup>, Mahmoud M. Abdel-Aal<sup>2</sup>, Wael M. Abdel-Mageed<sup>3, 4\*</sup>, Eman Abdelsalam<sup>2</sup>, and Sahar Abdelaziz<sup>2\*</sup>

<sup>1</sup>Department of Chemistry, Science College, Princess Nourah Bint Abdulrahman University, Riyadh 11671, Saudi Arabia; msalsaleem@pnu.edu.sa.

<sup>2</sup>Department of Pharmacognosy, Faculty of Pharmacy, Zagazig University, 44519 Zagazig, Egypt; wafaahbh@zu.edu.eg (W. H. B. H); zainb\_brahim@zu.edu.eg (Z. I. E); Mahmoud.ibrahim@su.edu.eg (M. M. A) eaamer@zu.edu.eg (E. A)

<sup>3</sup>Department of Pharmacognosy, College of Pharmacy, King Saud University, P.O. Box 2457, Riyadh 11451, Saudi Arabia; wabdelmageed@ksu.edu.sa.

<sup>4</sup>Department of Pharmacognosy, Faculty of Pharmacy, Assiut University, Assiut 71526, Egypt. waelcognosy@yahoo.com.

\* Correspondence: wabdelmageed@ksu.edu.sa (W. M. A. M); sah\_abdelaziz@zu.edu.eg (S. A)

## List of content

- **Table S1.**  $^1\text{H}$ NMR (400 MHz,  $\text{DMSO-}d_6$ ) and  $^{13}\text{C}$  NMR (100 MHz,  $\text{DMSO-}d_6$ ) data for kojic acid.
- **Figure S1.** Positive ESI-MS/MS spectrum of kojic acid.
- **Figure S2.** IR Spectrum of kojic acid.
- **Figure S3.**  $^1\text{H}$ NMR spectrum of kojic acid in  $\text{DMSO-}d_6$ .
- **Figure S4.**  $^{13}\text{C}$  NMR spectrum of compound kojic acid in  $\text{DMSO-}d_6$ .
- **Figure S5.** HSQC spectrum of kojic acid.
- **Figure S6.** HMBC spectrum of kojic acid.
- **Figure S7.** HMBC correlations of kojic acid.

**Table S1.**  $^1\text{H}$  NMR (400 MHz,  $\text{DMSO-}d_6$ ) and  $^{13}\text{C}$  NMR (100 MHz,  $\text{DMSO-}d_6$ ) data for kojic acid

| Position | $\delta\text{C}$ , ppm (mult.) | $\delta\text{H}$ , ppm [mult., J(HZ)] | HMBC (C $\rightarrow$ H)        |
|----------|--------------------------------|---------------------------------------|---------------------------------|
| 2        | 168                            | --                                    |                                 |
| 3        | 109.84 (d)                     | 6.33 (s)                              | H <sub>7</sub> , H <sub>8</sub> |
| 4        | 173.9 (s)                      | --                                    |                                 |
| 5        | 139.3 (s)                      | --                                    |                                 |
| 6        | 145.7 (d)                      | 8.02 (s)                              | H <sub>3</sub> , H <sub>6</sub> |
| 7        | 59.5 (t)                       | 4.29 (s)                              | H <sub>3</sub> , H <sub>8</sub> |
| 8        | --                             | 5.65 (t)                              |                                 |
| 9        | --                             | 9.04 (s)                              |                                 |

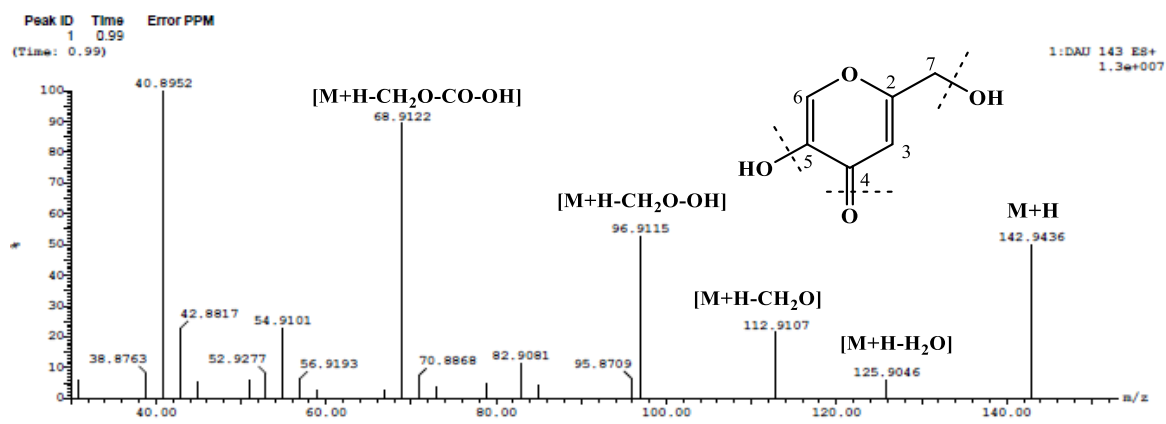

**Figure S1.** Positive ESI-MS/MS spectrum of kojic acid

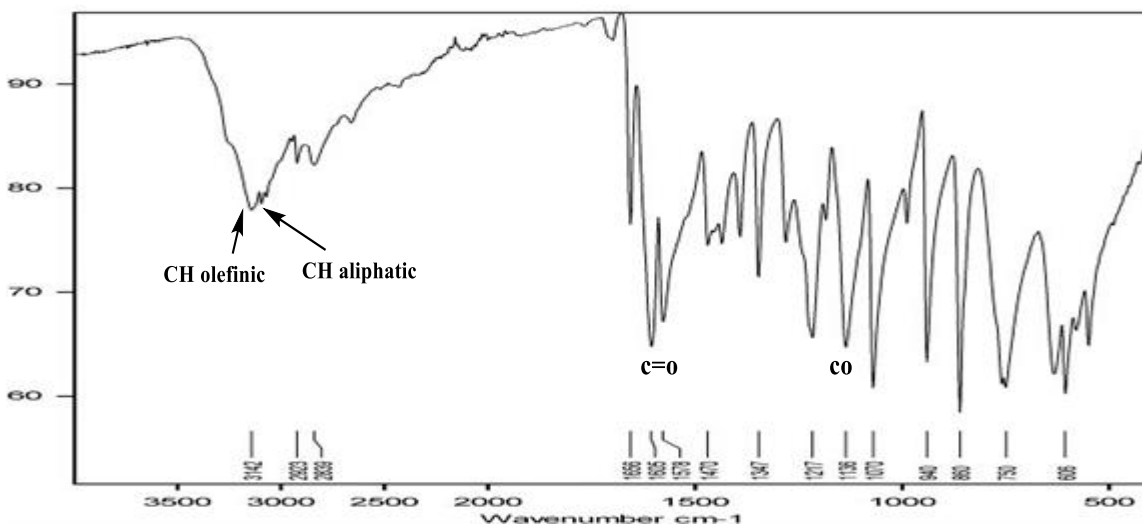

Figure S2. IR spectrum of kojic acid

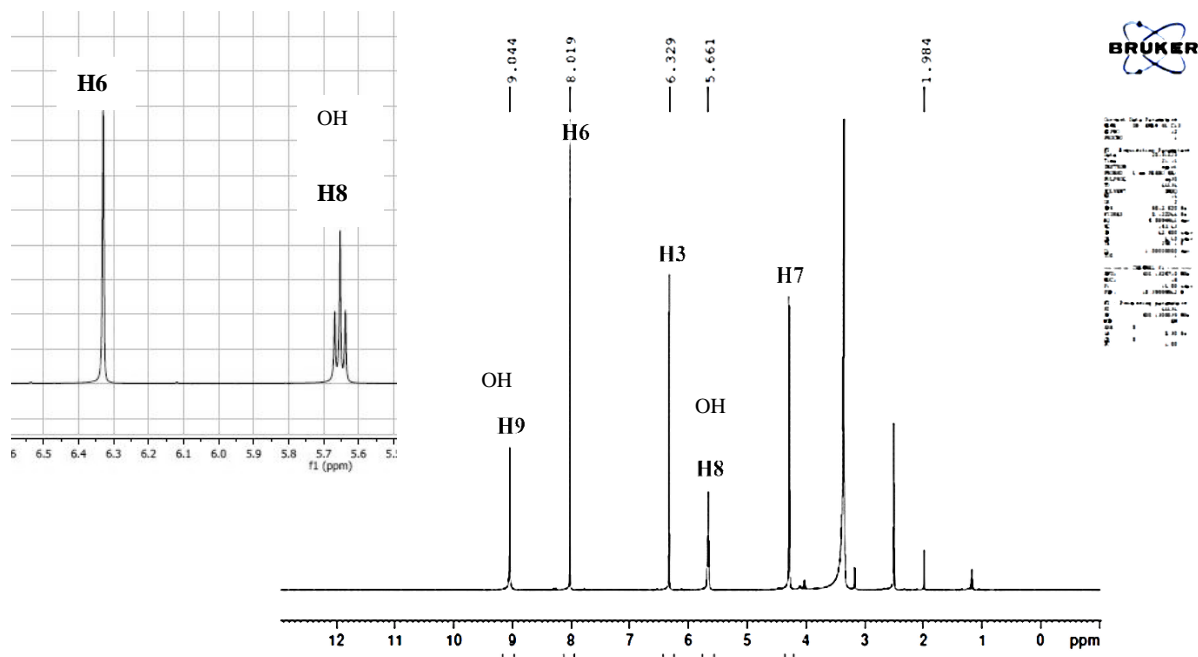

Figure S3. <sup>1</sup>H NMR spectrum of kojic acid

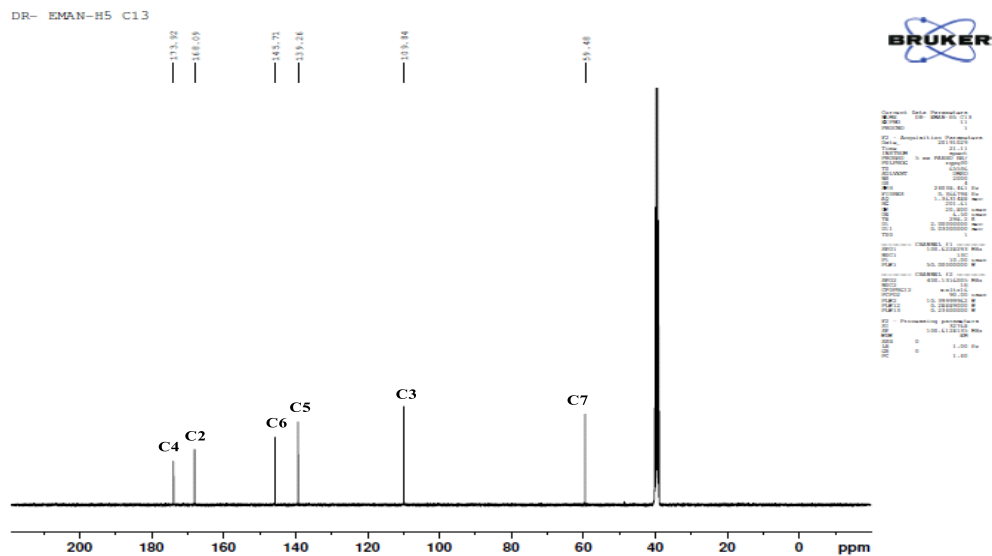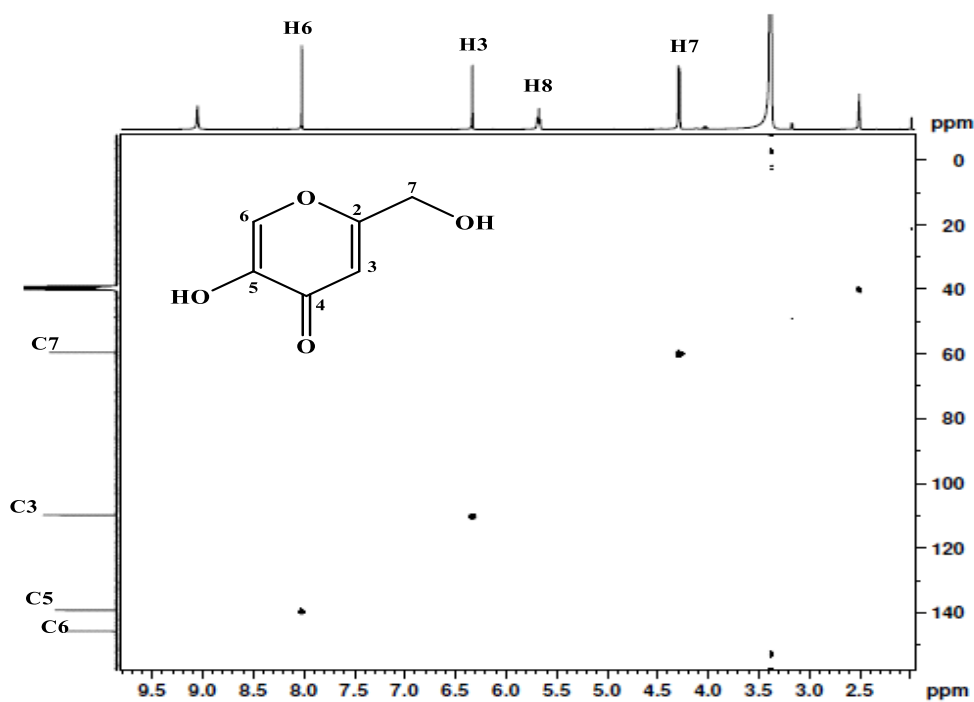

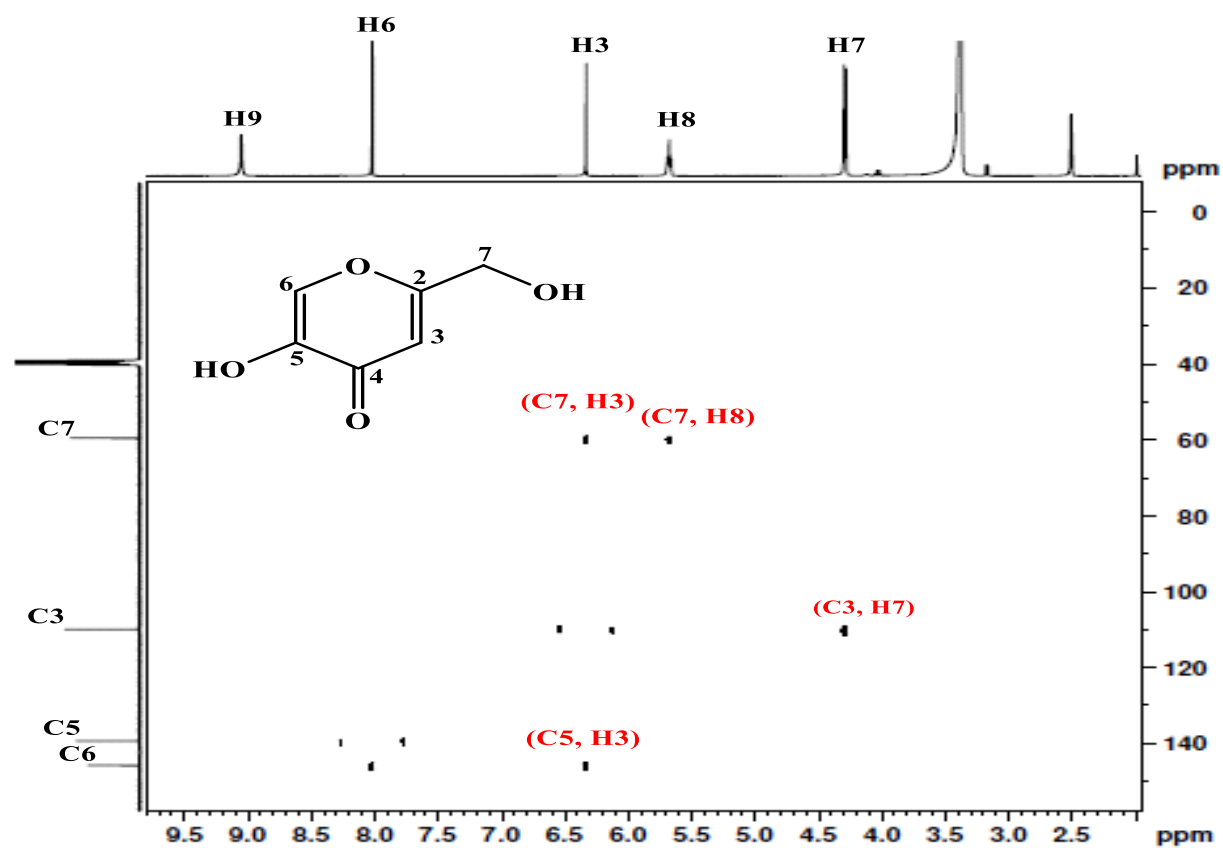

Figure S6. HMBC spectrum of kojic acid

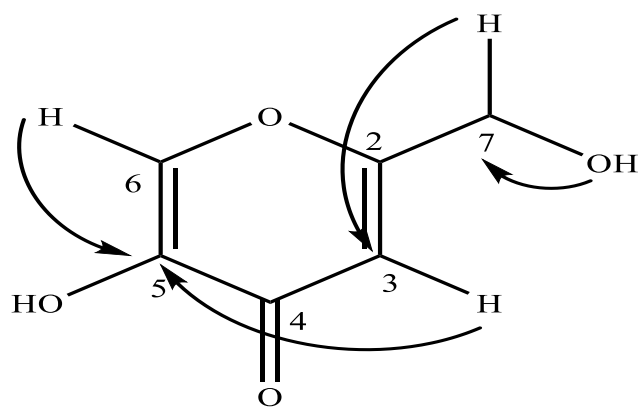

Figure S7. HMBC correlation of kojic acid
